# Supplementary material for: Rational construction of ZnO/CuS heterostructures-modified PVDF nanofiber photocatalysts with enhanced photocatalytic activity
Source: Royal Society of Chemistry journal article supplement (doi:10.1039/d2ra06151a), 2022-01-01
Supplement: d2ra06151a1.pdf [file d2ra06151a1.pdf]

# Rational Construction of ZnO/CuS Heterostructures-Modified PVDF Nanofiber Photocatalysts with Enhanced Photocatalytic Activity

Chuanfeng Zang,<sup>a</sup> Hao Chen,<sup>a</sup> Xiangye Han,<sup>a</sup> Wei Zhang,<sup>a,\*</sup> Junfang Wu,<sup>a</sup> Fanghua Liang,<sup>a</sup> Jiamu Dai,<sup>a</sup> Hongchao Liu,<sup>b</sup> Guangyu Zhang,<sup>a,\*</sup> Ke-Qin Zhang,<sup>c</sup> Mingzheng Ge<sup>a,b,c,\*</sup>

<sup>a</sup>School of Textile and Clothing, Nantong University, Nantong, 226019, P. R. China

<sup>b</sup>Institute of Applied Physics and Materials Engineering, University of Macau, Macau 999078, P. R. China.

<sup>c</sup>Jiangsu Engineering Research Center of Textile Dyeing and Printing for Energy Conservation, Discharge Reduction and Cleaner Production, National Engineering Laboratory for Modern Silk, College of Textile and Clothing Engineering, Soochow University, Suzhou 215123, P. R. China

\*Corresponding author: zhangwei@ntu.edu.cn; zgyu85@ntu.edu.cn; mingzhengge@umac.mo

## Supporting Information

### 1. Supporting Figures

**Figure S1.** SEM image of the PVDF/CuS nanocomposites.

**Figure S2.** EDX spectrums of PVDF/ZnO/CuS.

**Figure S3.** Photocurrent response of the prepared photocatalysts under visible light illumination.

## 1. Supporting Figures

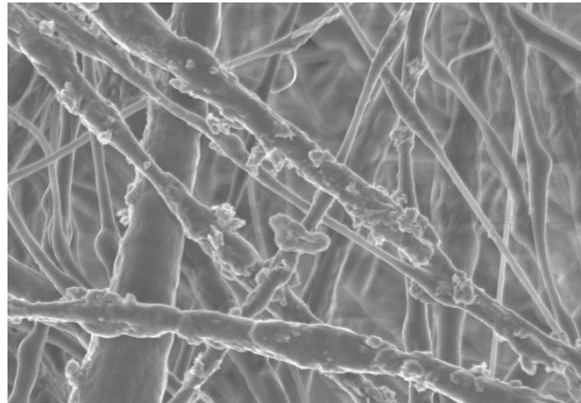

**Figure S1.** SEM image of the PVDF/CuS nanocomposites.

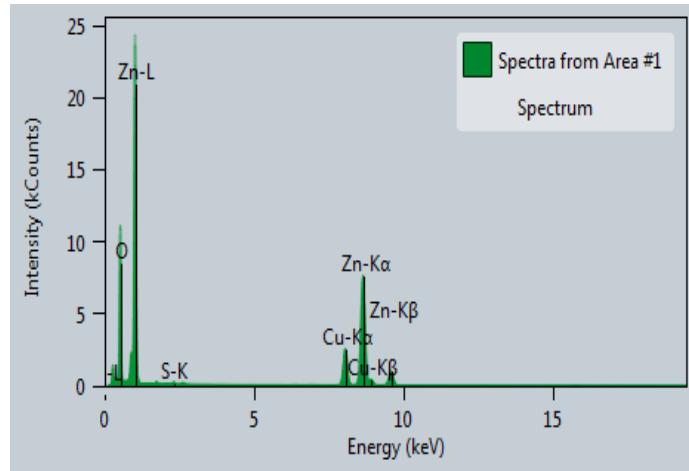

**Figure S2.** EDX spectrums of PVDF/ZnO/CuS.

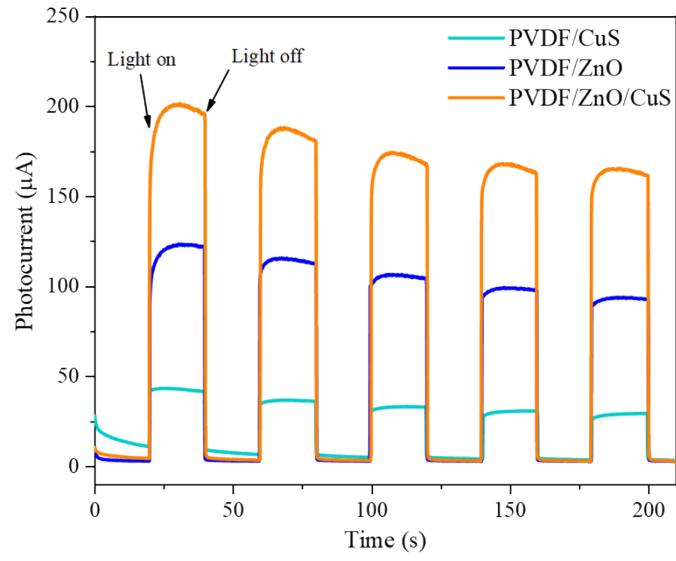

**Figure S3.** Photocurrent response of the prepared photocatalysts under visible light illumination.
